# Supplementary material
Source: publisher figshare collection journal article supplement (https://acs.figshare.com/ndownloader/files/4763854)
Supplement: Supplementary file 1 [file 4763854]

**Supporting information**

# A Simple Solution Route to Single-Crystalline Sb<sub>2</sub>O<sub>3</sub> Nanowires with Rectangular Cross Sections

*Zhengtao Deng,<sup>†,§</sup> Fangqiong Tang,<sup>\*†</sup> Dong Chen,<sup>†</sup> Xianwei Meng,<sup>†</sup> Li Cao,<sup>‡</sup> and*

*Bingsuo Zou<sup>‡</sup>*

<sup>†</sup> Technical Institute of Physics and Chemistry, Chinese Academy of Sciences.

<sup>‡</sup> Institute of Physics, Chinese Academy of Sciences.

<sup>§</sup> Graduate University of Chinese Academy of Sciences.

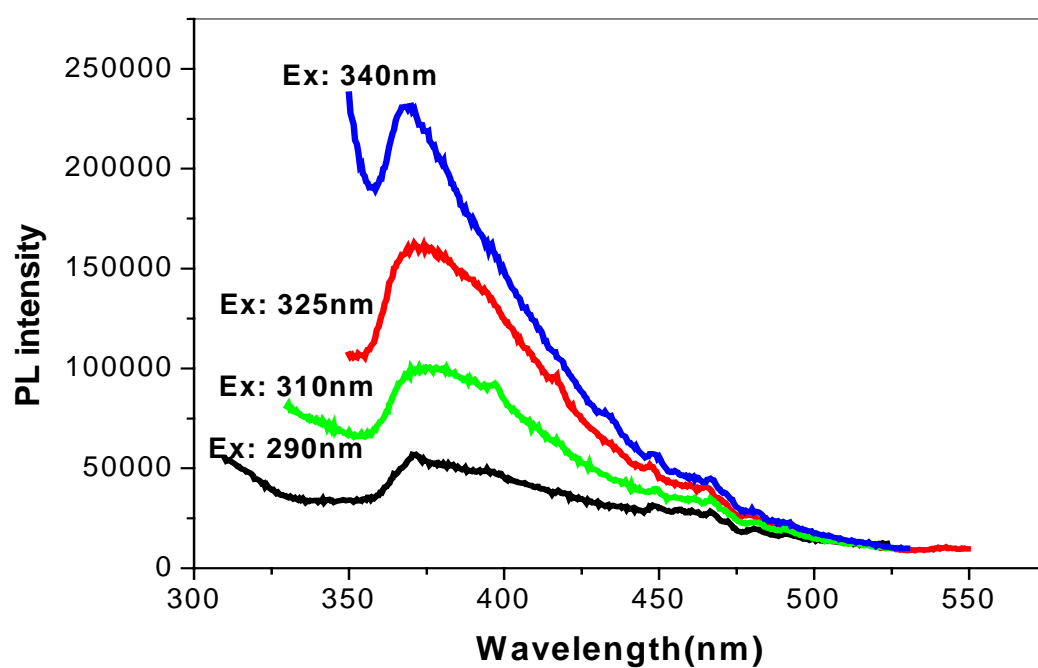

**Figure S1.** The PL spectra of the as-synthesized  $\text{Sb}_2\text{O}_3$  nanowires excited at various wavelengths.
